# Supplementary material
Source: PubMed Central journal article supplement (PMC3177051)
Supplement: mmc1.pdf [file mmc1.pdf]

## Supplementary information

### Relation between molecular shape and the morphology of self-assembling aggregates: a simulation study

Robert Vácha and Daan Frenkel

We present snapshots of protein self-assembled structures described in the text.

Figure1.: A bundle of alpha-helices (2A01 in Protein Database), where secondary structure is displayed and is colored based on charge (red and blue), polarity (green) and hydrophobicity (white) of amino acids:

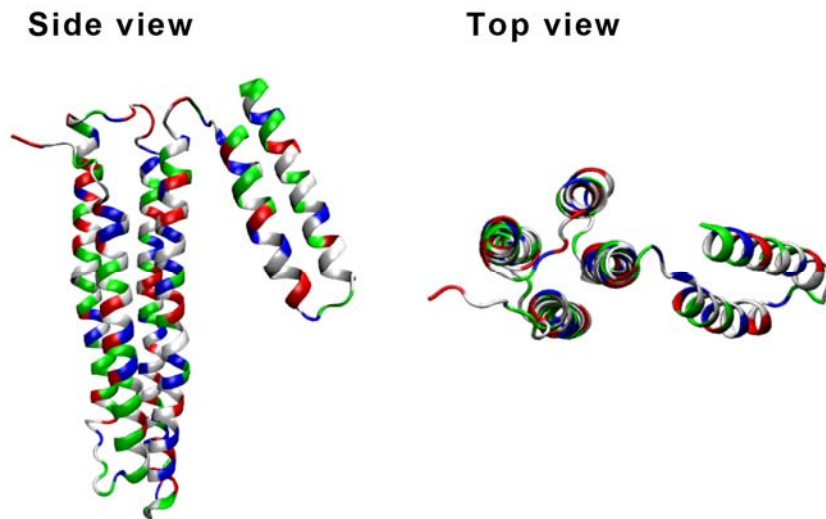

Figure 1.

Figure2.: A cut through the middle of a protein vesicle formed as bilayer of alpha-helices (3GE4 in Protein Database), where alpha-helices are visualised as rods and unstructured loops as wires. Note that only parts of alpha-helices are shown at the cut plane.

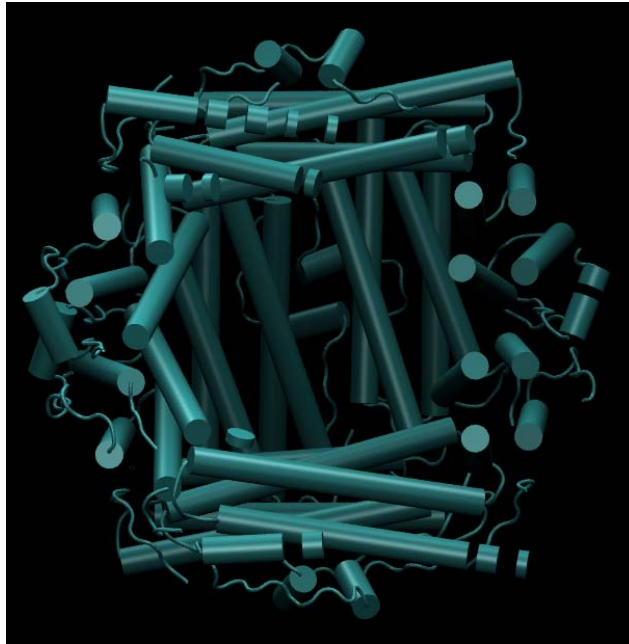

Figure 2.
